# Supplementary material
Source: PubMed Central journal article supplement (PMC3807483)
Supplement: JB.00353-13_zjb999092864so1.pdf [file JB.00353-13_zjb999092864so1.pdf]

# **The function of the Na<sup>+</sup>-driven flagellum of *Vibrio cholerae* is determined by osmolality and pH**

**Petra Halang<sup>1</sup>, Sebastian Leptihn<sup>1</sup>, Thomas Meier<sup>2</sup>, Thomas Vorburger<sup>1\*</sup>, Julia Steuber<sup>1\*</sup>**

<sup>1</sup>Institute of Microbiology, University of Hohenheim (Stuttgart), 70599 Stuttgart, Germany;

<sup>2</sup>Department of Structural Biology, Max Planck Institute of Biophysics, 60438 Frankfurt am Main, Germany.

Cluster of Excellence Macromolecular Complexes, Goethe-University, 60438 Frankfurt/Main, Germany

## **Supporting Information**

\*Address correspondence to:

Julia Steuber and Thomas Vorburger, Institute of Microbiology, University of Hohenheim (Stuttgart),  
70599 Stuttgart, Germany

Phone: +49 711 459 22228; Fax: +49 711 459 22238

E-mail: [julia.steuber@uni-hohenheim.de](mailto:julia.steuber@uni-hohenheim.de); [t.vorburger@uni-hohenheim.de](mailto:t.vorburger@uni-hohenheim.de)

**Table S1. Oligonucleotides used in this study.**

| Oligonucleotide                    | Sequence (5' – 3')                                  | Restriction sites         |
|------------------------------------|-----------------------------------------------------|---------------------------|
| VCmotAV-III                        | GCCGCGCGGCAGC <u>CATATGG</u> ATTTAGCAAC             | <i>NdeI</i>               |
| VCmotBR-III                        | GGTGGCTCCAC <u>TCGAG</u> TTGTTGTCCACCGC             | <i>XhoI</i>               |
| VCmotAV-IV                         | GAAAGATCACACCGCCGTGGAAGAG                           |                           |
| VCmotBR-IV                         | ACATTTCCCCGAAAAGTGCCACCTG                           |                           |
| VCb82V-D23N                        | GGCTG <u>GGTACCT</u> TTTGCGAACTTGATGTCACTGC         | <i>KpnI</i>               |
| VCb49R-D23N                        | GCAGTGACATCAAGTTCGCAAAG <u>GGTACCC</u> AGCC         | <i>KpnI</i>               |
| VCb82V-D23E                        | GGCTG <u>GGTACCT</u> TTTGCGGAATTGATGTCACTGC         | <i>KpnI</i>               |
| VCb49R-D23E                        | GCAGTGACATCAATTCCGCAAAG <u>GGTACCC</u> AGCC         | <i>KpnI</i>               |
| VCb90V-S26A                        | GGCTG <u>GGTACCT</u> TTTGCGGACTTGATGGCACTGCTGATGTGC | <i>KpnI</i>               |
| VCb50R-S26A                        | GCACATCAGCAGTGCCATCAAGTCCGCAAAG <u>GGTACCC</u> AGCC | <i>KpnI</i>               |
| VCb90V-S26T                        | GGCTG <u>GGTACCT</u> TTTGCGGACTTGATGACACTGCTGATGTGC | <i>KpnI</i>               |
| VCb50R-S26T                        | GCACATCAGCAGTGTCATCAAGTCCGCAAAG <u>GGTACCC</u> AGCC | <i>KpnI</i>               |
| <i>pomB</i> -D42N fwd              | CGGAGATG <u>AACGTT</u> CTGAAATTTAAGCAGATCGCTGGC     | <i>AclI</i>               |
| <i>pomB</i> -D42N rev              | GCCAGCGATCTGCTTAAATTTCAAG <u>AACGTT</u> CATCTCCG    | <i>AclI</i>               |
| GFP-V                              | CTACTAGTATG <u>GCTAGC</u> AGCAAAGGAG                | <i>NheI</i>               |
| GFP-R                              | GCTCATTA <u>ACCGG</u> TTTTGTAGAGTTCATCC             | <i>AgeI</i>               |
| VCmotBV- <i>NheI</i> - <i>AgeI</i> | CCGACTATG <u>GCTAGCACCGGT</u> ATGGATGACGAACAACAATG  | <i>NheI</i> , <i>AgeI</i> |
| VCmotBR- <i>NheI</i> - <i>AgeI</i> | GTTCGTCATCCAT <u>ACCGGTGCTAGCC</u> CATAGTCGGCTCC    | <i>AgeI</i> , <i>NheI</i> |
| WS-013-GFPend-f                    | CCCAACGAAAAGCGTGACCACATGGTC                         |                           |

Introduced restriction sites are underlined and shown in italics.

**Table S2. Quantitative analysis of flagellation of *V. cholerae*  $\Delta pomAB$  producing His-tagged PomA together with PomB variants.** Cells were grown in M9 minimal medium pH 8.0 without added sodium and inspected using Transmission Electron Microscopy (see Fig. S3). For each PomB variant, a total of 149 to 162 individual cells were inspected and categorized into flagellated cells (“+ flagellum”) or aflagellated cells (“– flagellum”).

| PomB variant | Number of cells |             |                                 |
|--------------|-----------------|-------------|---------------------------------|
|              | + flagellum     | – flagellum | Total number of cells inspected |
| WT           | 135 (83%)       | 27 (17%)    | 162 (100%)                      |
| D23E         | 118 (75%)       | 40 (25%)    | 158 (100%)                      |
| D23N         | 142 (95%)       | 7 (5%)      | 149 (100%)                      |
| S26A         | 115 (76%)       | 36 (24%)    | 151 (100%)                      |
| S26T         | 116 (75%)       | 38 (25%)    | 154 (100%)                      |
| D42N         | 112 (74%)       | 39 (26%)    | 151 (100%)                      |



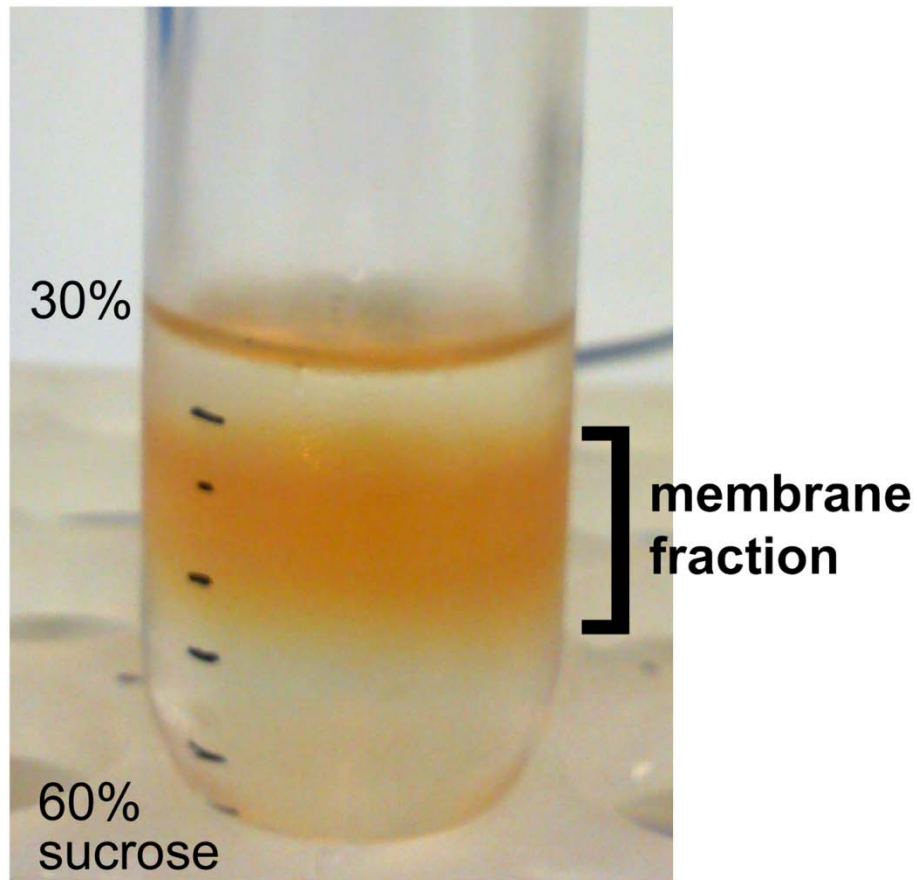

**Figure S2: Purification of isolated membranes using sucrose gradient centrifugation.** Gradient ranged from 30 to 60% sucrose (w/v). After centrifugation, a clear, brownish fraction was visible which represents the purified membranes. Protein concentration was determined using a BCA assay. The concentration of proteins in the upper and lower fraction was below the detection level. The purified membranes were used for further analysis (SDS-PAGE and western blot).

Function of the flagellum from *V. cholerae*

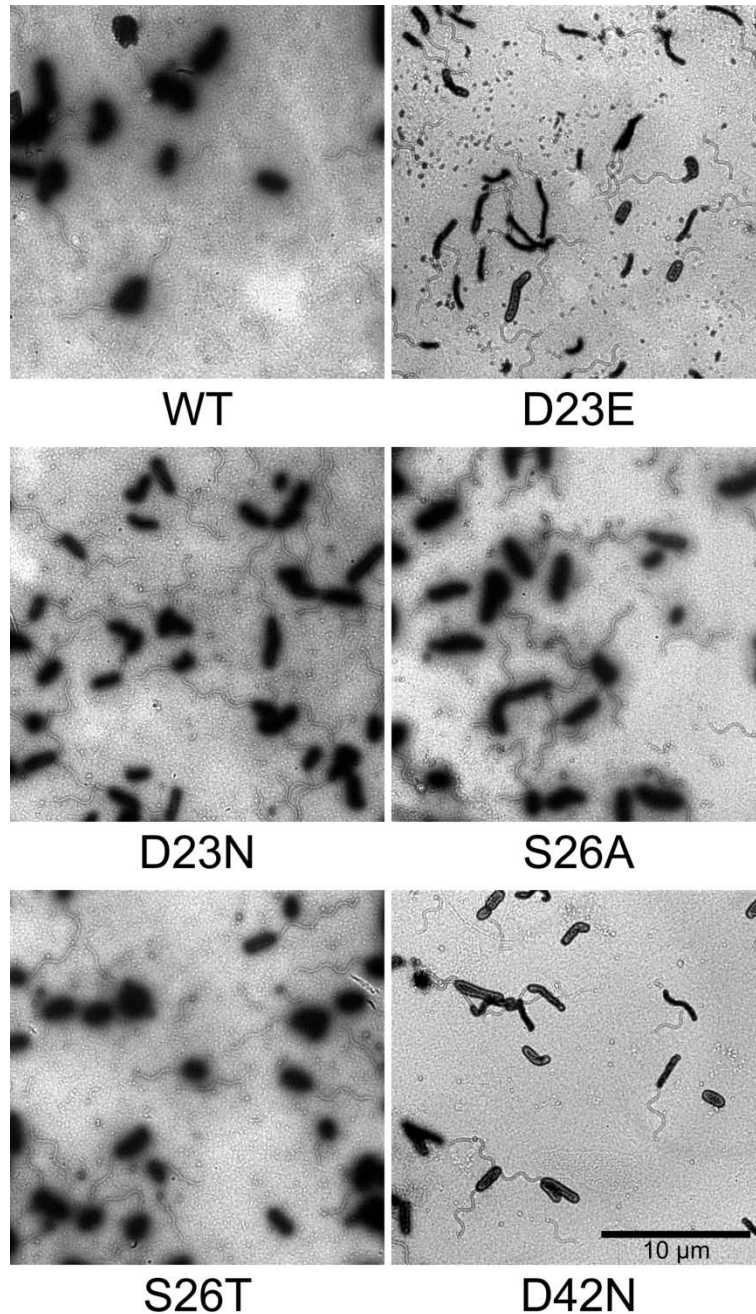

**Figure S3: Flagellation state of *V. cholerae*  $\Delta pomAB$  complemented with plasmids pAB coding for His-PomA and PomB (wt and variants).** Cells were grown on sodium-depleted M9 minimal medium supplemented with 10 mM arabinose at pH 8.0. Aliquots of the bacterial cultures (10  $\mu$ L) were adsorbed on Pioloform coated copper grids and stained with uranyl acetate as described in Materials and Methods. Pictures were recorded using a Transmission Electron Microscope (LEO 912AB, Zeiss, Germany) at 80kV and at a magnification of 630 x. Scale bar indicates 10  $\mu$ m. See Table S2 for the relative abundance of flagella.

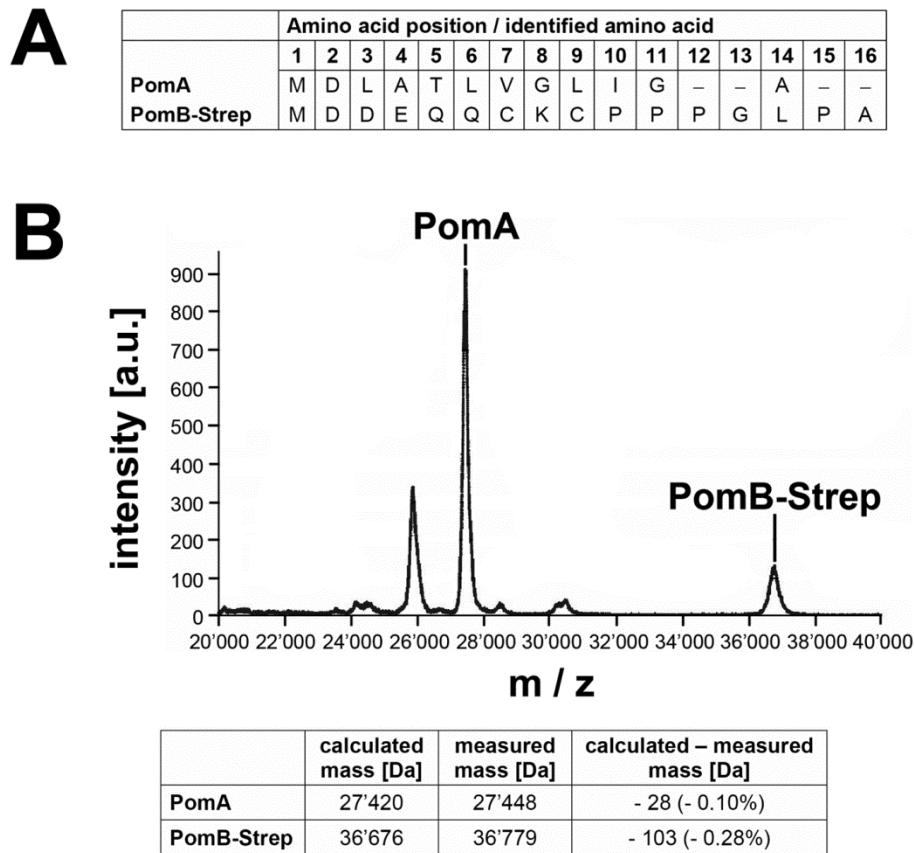

**Figure S4: Edman sequencing and MALDI-MS analysis of *V. cholerae* PomAB.** (A) For N-terminal sequencing, PomAB was expressed in *E. coli* C41 (DE3) from plasmid pET18ABS and enriched as described in the main text. After separation by SDS-PAGE, the proteins were transferred to polyvinylidene fluoride (PVDF) membrane following the semi-dry protocol described by the manufacturer of the blotting apparatus (Amersham Biosciences Europe GmbH, Germany). Blot staining was performed with 0.1% Coomassie-G250, and membrane pieces containing bands of PomA or PomB were used for N-terminal sequence analysis using a protein sequencer (Applied Biosystems 470/A) with on-line phenylthiohydantoin amino acid detection by HPLC (Applied Biosystems 120). (B) The molecular masses of PomA and PomB were determined on a Perseptive Biosystems Voyager Elite system, a MALDI time-of-flight instrument with reflector. The measurements were recorded in the linear positive mode with an instrument accuracy of 0.3%. A layer of sinapinic acid was deposited on the target from a saturated stock solution in acetonitrile/ddH<sub>2</sub>O (2:1, v/v), containing 0.1% trifluoroacetic acid. Immediately before analysis, dried protein samples were dissolved in a buffer containing 20 mM Tris-HCl pH 7.5 and 1% octylglucoside and placed onto the layer of sinapinic acid.

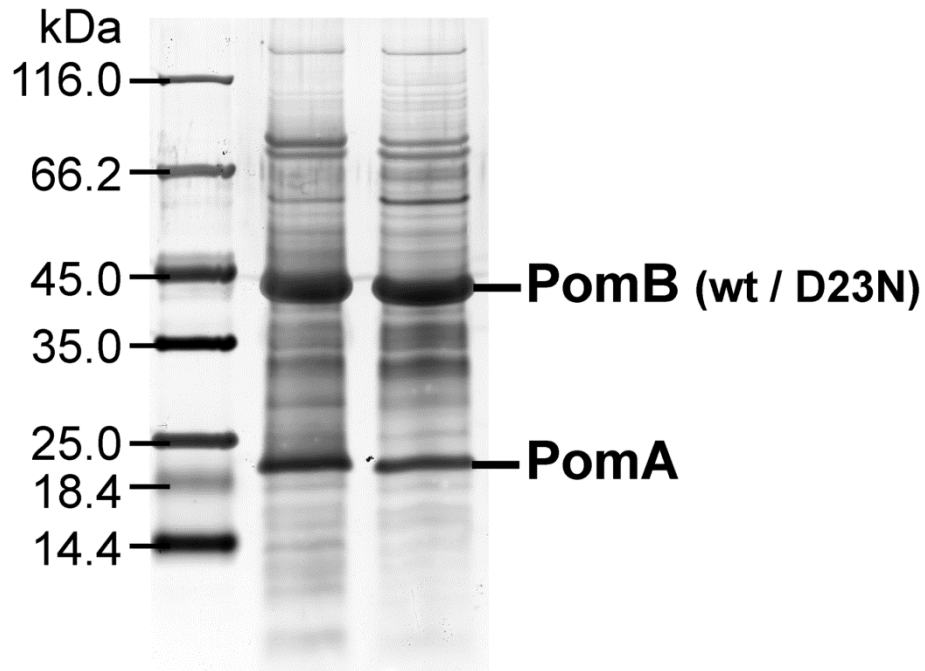

**Figure S5: SDS-PAGE of PomA in complex with PomB or with the PomB variant carrying the D23N substitution.** PomAB containing membranes were solubilised with Cymal-5 as described in Materials and methods. PomB was bound to Strep-Tactin *via* its C-terminally fused Strep-tag, PomA was co-purified by its interaction with PomB. Left: wild-type PomA co-purified with wild-type PomB (2.2  $\mu$ g); right: wildtype-PomA co-purified with the D23N variant of PomB-D23N (2.8  $\mu$ g). The gel was stained with silver.



Function of the flagellum from *V. cholerae*

|      | TM-helix I PomA |                           |                    |                                 |                                 |                                 |                             |                 |               |            | TM-helix II PomA |         |       |       |    |    |    |    |  |  |
|------|-----------------|---------------------------|--------------------|---------------------------------|---------------------------------|---------------------------------|-----------------------------|-----------------|---------------|------------|------------------|---------|-------|-------|----|----|----|----|--|--|
|      | 10              | 20                        | 30                 | 40                              | 50                              | 60                              | 10                          | 20              | 30            | 40         | 50               | 60      | 10    | 20    | 30 | 40 | 50 | 60 |  |  |
| Vcho | -----           | MDLATLVGLIGGMFAVIMAMVLGGS | -----              | IMMFVDVSVLIVVGGSVFVLMKFEMGQFFGA | AKIAGK                          | ----                            | AFMFK                       |                 |               |            |                  |         |       |       |    |    |    |    |  |  |
| Vvul | -----           | MDLATLLGLIGGLAFVVMAMILGGS | -----              | IMMFVDVTSILIVVGGSI              | FVLMKFTMGQFFGA                  | AKIAGK                          | ----                        | AFMFK           |               |            |                  |         |       |       |    |    |    |    |  |  |
| Vcar | -----           | MDLATLVGLIGGFVAVIMAMILGGS | -----              | ITMFDVTSILIVVGGSI               | FVVMKFTMGQFFG                   | AGKIAGK                         | ----                        | AFMFK           |               |            |                  |         |       |       |    |    |    |    |  |  |
| Vspl | -----           | MDLATLI                   | GLIGGFVAVIMAMILGGS | -----                           | LGMFYD                          | TTSILIVVGGSTFVLMKFTMGQFFG       | ATKIAGK                     | ----            | AFMFK         |            |                  |         |       |       |    |    |    |    |  |  |
| Vori | -----           | MDLATLVGLIGGFVAVIMAMILGGS | -----              | IMMFDVTSILIVVGGSTFVLMKFTMGQFFG  | AAKIAGK                         | ----                            | AFMFK                       |                 |               |            |                  |         |       |       |    |    |    |    |  |  |
| Vmim | -----           | MDLATLI                   | GLIGGLAFVIMAMVLGGS | -----                           | LMMFVDVSVLIVVGGSVFVLMKFTMGQFFG  | AGKIASK                         | ----                        | AFMFK           |               |            |                  |         |       |       |    |    |    |    |  |  |
| Vfur | -----           | MDLATLI                   | GLIGGLAFVVMAMVLGGS | -----                           | IMMFVDVTSILIVVGGSLFVLMKFTMGQFFG | AAKIAGK                         | ----                        | AFMFK           |               |            |                  |         |       |       |    |    |    |    |  |  |
| Valg | -----           | MDLATLLGLIGGFVAVIMAMVLGGS | -----              | IGMFVDVTSILIVVGGSI              | FVLMKFTMGQFFG                   | ATKIAGK                         | ----                        | AFMFK           |               |            |                  |         |       |       |    |    |    |    |  |  |
| Vhar | -----           | MDLATLI                   | GLIGGFVAVIMAMVLGGS | -----                           | IGMFVDVTSILIVVGGSAFVLMKFTMGQFFG | ATKIAGK                         | ----                        | AFMFK           |               |            |                  |         |       |       |    |    |    |    |  |  |
| Vcor | -----           | -----                     | -----              | -----                           | MMFVDVTSILIVVGGSTFVLMKFTMGQFFG  | AAKIAGK                         | ----                        | AFMFK           |               |            |                  |         |       |       |    |    |    |    |  |  |
| Vpar | -----           | MDLATLVGLIGGFVAVIMAMILGGS | -----              | IMMFVDVTSILIVVGGSTFVLMKFTMGQFFG | AAKIAGK                         | ----                            | AFMFK                       |                 |               |            |                  |         |       |       |    |    |    |    |  |  |
| Alvi | -----           | MDLATLLGLVGMAMVMIGAVLGGD  | -----              | VMFVDIPSIVIVFVCTAFVLFRTTFGQFLGS | FKVALG                          | ----                            | AFLNK                       |                 |               |            |                  |         |       |       |    |    |    |    |  |  |
| Aehy | -----           | MDLGLSLGLVGGFAFVIMAMILGGS | -----              | MSMYDMP                         | SVYITILGSLFICMMLKFTMGQFFG       | AAKIAGK                         | ----                        | AFMFK           |               |            |                  |         |       |       |    |    |    |    |  |  |
| Sama | -----           | MDLATLI                   | GLLGAFVAVIMAMVTGGG | -----                           | LAIFVDIPSIVIVFVGGSLFVVMKFNKQFFG | AVKIAAK                         | ----                        | AFMFK           |               |            |                  |         |       |       |    |    |    |    |  |  |
| Bcer | -----           | MREENQLLARPKKKRKF         | DISPFELI           | VALAVLITAIMLGGG                 | GMGFKNFLDVSSILIVVGGTIATII       | IAYRFSEIKKYVKSIFS               | ----                        | VLHRK           |               |            |                  |         |       |       |    |    |    |    |  |  |
| Rosp | -----           | MDLATLI                   | GLVGFVAVIMAMVLGGS  | -----                           | FSQFIDVPSILIVVGGGLL             | ATLIRFQLNDIATAFITAFKC           | ----                        | AFTRK           |               |            |                  |         |       |       |    |    |    |    |  |  |
| Asal | -----           | MDLATLI                   | GLVGFVAVIMAMVLGGS  | -----                           | LAIFMDVTSIVIVFVGGSI             | FVLMKFTMGQFFG                   | ATKIAGK                     | ----            | AFIFK         |            |                  |         |       |       |    |    |    |    |  |  |
| Sone | -----           | MSFIV                     | VALVFI             | VGNLIEGGH                       | -----                           | PSALLDLP                        | AFMIVIGGTIGATVAQFFVSVI      | IASMKR          | FKWL          | ----       | IFP-L            |         |       |       |    |    |    |    |  |  |
| Dbac | -----           | MDLATI                    | GLVAFGLVIAALGGD    | -----                           | FLFLDFSS                        | LIVIGGTIGAVLVTPLESVLG           | VARI                        | IKK             | ----          | TFMSK      |                  |         |       |       |    |    |    |    |  |  |
| Ghol | -----           | MDLATLI                   | GLLGAFVAVIMAMVLGGS | -----                           | ISMFDVPS                        | TLIVVGGSLFVLMKFTMGQFFG          | ATKIAGK                     | ----            | AFMFK         |            |                  |         |       |       |    |    |    |    |  |  |
| Pro  | -----           | MDLATLI                   | GLVGFVAVIMAMVLGGS  | -----                           | LGMFVDVPS                       | IVIVLGGTTFVVL                   | IKYSISIQFFGA                | AKIAVK          | ----          | AFMFK      |                  |         |       |       |    |    |    |    |  |  |
| Pssp | -----           | MDLATI                    | GLVIAACVTLIAIFLGGG | -----                           | FSQFV                           | DLPSILIVVGGGLAATL               | ANFPLNGQLLSAF               | GKVAKL          | ----          | AFTHK      |                  |         |       |       |    |    |    |    |  |  |
| Psys | -----           | MDLATLLGLVGFVAVIMAMVLGGS  | -----              | MDMFD                           | TTSILIVVGGSLFVVMKYNLQFLG        | AVKI                            | AMK                         | ----            | AFLHK         |            |                  |         |       |       |    |    |    |    |  |  |
| Bamy | -----           | MKRFDY                    | LPVGFMLGCI         | I                               | VAIGILSGTGLAG                   | -----                           | ISSFLDLT                    | SFLIVTGGLAAAV   | IFSPPRDLK     | KTPSVLQK   | ----             | VFSRQ   |       |       |    |    |    |    |  |  |
| Dede | -----           | MDIATLLGLVIA              | YALV               | FVSL                            | LMGPG                           | -----                           | VGVI                        | DIP             | SVLIVIGGT     | FGIIFMNYPM | KNVFNII          | IAIVMK  | ----  | TFLFK |    |    |    |    |  |  |
| Ptun | -----           | MDLATLI                   | GLVIA              | GFVAVIMAMVLGGS                  | -----                           | LGMFVD                          | PSVIVVGGSLFVLMKFTMGQFFG     | ATKIAGK         | ----          | AFMFK      |                  |         |       |       |    |    |    |    |  |  |
| Bspc | -----           | MRKVDML                   | TPAGLMVGLAM        | LIFGIMWNGGADG                   | -----                           | FLSFD                           | VPSSILIVVGGGLIAGLL          | VSFLKDIRHMAT    | VFKQ          | ----       | VFSSE            |         |       |       |    |    |    |    |  |  |
| Colp | -----           | MDLATLI                   | GLVIA              | GLLVMAMVLGGS                    | -----                           | IMMFAD                          | TQSVLIVVGGSI                | FVLSN           | YNLGGQFFG     | GIGKI      | IGK              | ----    | AFMFK |       |    |    |    |    |  |  |
| Bsub | -----           | MLFSW                     | GEMMKRFDY          | LPVGFV                          | LTII                            | VIGIISGSGVSG                    | -----                       | FRSFLDLT        | SFFIVTGGLCAAV | IFSPPREL   | KKAPSVLQK        | ----    | AFIRQ |       |    |    |    |    |  |  |
| Iloi | -----           | MDIATLLGLVIA              | GFVAVIMAMVLGGS     | -----                           | ITLFLD                          | TQSFIVVGGSLF                    | ITLANFSLGQFLG               | AVKVVV          | ----          | AFFFK      |                  |         |       |       |    |    |    |    |  |  |
| Hche | -----           | MDLATLLGLIGGLAV           | TMAMVLGGS          | -----                           | IGMFVD                          | VPSLIVVGGTLLVLMKFTMGQFFG        | ATKIAGK                     | ----            | AFMFK         |            |                  |         |       |       |    |    |    |    |  |  |
| C1le | -----           | MDISTII                   | GLVSGIVFVLSIVL     | -----                           | DGRIM                           | LFDYPSMLIVVGGIISALFVSYPIPKFLEGL | KTGKH                       | ----            | VFSKQ         |            |                  |         |       |       |    |    |    |    |  |  |
| Desa | -----           | MDLATLI                   | GLVLSVLLMGAILL     | GGDA                            | -----                           | PGIFFN                          | PPSVLIVVGGT                 | LATAMIRF        | SMADVINSAR    | IAMN       | ----             | AFTRM   |       |       |    |    |    |    |  |  |
| Bsel | -----           | MKKFDLL                   | TPVGF              | FLGLTAVLMAIYVNEAGDGS            | ILDFVQV                         | ASLLVVFGLLIGALT                 | VNFSIGDLKLL                 | PRVFKE          | ----          | TFQTK      |                  |         |       |       |    |    |    |    |  |  |
| Spea | -----           | MDLATLI                   | GLVIA              | GFVAVIMAMVSGGG                  | -----                           | IGIF                            | INVPSILIVVGGT               | LFVVMKYNLQFLG   | SAKIAAK       | ----       | AFIFK            |         |       |       |    |    |    |    |  |  |
| Niwa | -----           | MDLATLLGLVIA              | GFVAVIMAMVLGGS     | -----                           | VLVFN                           | PPSLLIVVGGT                     | TAVVLMKFTMGQFFG             | ATKIAGK         | ----          | AFMYK      |                  |         |       |       |    |    |    |    |  |  |
| Nhal | -----           | MDLATLI                   | GLVIA              | GFVAVIMAMVLGGS                  | -----                           | VLVFN                           | PPSLLIVVGGT                 | TAVVLMKFTMGQFFG | ATKIAGK       | ----       | AFVYK            |         |       |       |    |    |    |    |  |  |
| Ttur | -----           | MDLATIV                   | GLVIA              | GFVAVIMAMVLGGS                  | -----                           | LGMFV                           | NAPSLIVVGGT                 | IFAVMAKYGLGQFLG | AVKVAK        | ----       | SFSK             |         |       |       |    |    |    |    |  |  |
| Coli | -----           | MDLATLLGLVIA              | GFVAVIMAMVLGGS     | -----                           | ALVF                            | INVPSILIVVGGT                   | VVMKFTMGQFFG                | ATKIAGK         | ----          | AFINK      |                  |         |       |       |    |    |    |    |  |  |
| Rspc | -----           | MDIATIV                   | GLVIA              | GFVAVIMAMVLGGS                  | -----                           | LGIF                            | INIPSLIVVGGSTFVLMKFTMGQFFG  | ATKIAGK         | ----          | AFSFS      |                  |         |       |       |    |    |    |    |  |  |
| Vvul | -----           | MDLATLLGLVIA              | GFVAVIMAMVLGGS     | -----                           | IMMFVD                          | VTSILIVVGGSI                    | FVLMKFTMGQFFG               | AAKIAGK         | ----          | AFMFK      |                  |         |       |       |    |    |    |    |  |  |
| Ospc | -----           | MDIATLV                   | GLVIA              | GFVAVIMAMVLGGS                  | -----                           | VGVI                            | INPPSLLIVVGGSLFVLMKFTMGQFFG | AAKIAGK         | ----          | AFMFK      |                  |         |       |       |    |    |    |    |  |  |
| Sacd | -----           | MDLATIV                   | GLVIA              | GFVAVIMAMVLGGS                  | -----                           | LGMFV                           | NGPSLIVVGGT                 | IFACMAKFTMGQFFG | ATKIAGK       | ----       | SFTNK            |         |       |       |    |    |    |    |  |  |
| Fbal | -----           | MDLATLI                   | GLVIA              | GFVAVIMAMVQGGD                  | -----                           | VMIFV                           | NIESVIVLGGSLFVVMKFTMGQFFG   | AVKIATK         | ----          | AFMFK      |                  |         |       |       |    |    |    |    |  |  |
| Shdy | -----           | MLILL                     | GLVVL              | GTVFGGYLMTGG                    | -----                           | SLGALY                          | QPAELVIA                    | CAGIGSFIVG      | NNGKAIKGT     | LKALPLLF   | FRRSKYT          | ----    |       |       |    |    |    |    |  |  |
| Ecol | -----           | MLILL                     | GLVVL              | GTVFGGYLMTGG                    | -----                           | SLGALY                          | QPAELVIA                    | CAGIGSFIVG      | NNGKAIKGT     | LKALPLLF   | FRRSKYT          | ----    |       |       |    |    |    |    |  |  |
| Cyou | -----           | MRKDDV                    | LVILL              | GLVVL                           | GTVFGGYLMTGG                    | -----                           | HLGALY                      | QPAELVIA        | CAGIGSFIVG    | NNGKAIKGT  | TMKAIPL          | FRRSKYT | ----  |       |    |    |    |    |  |  |
| Ypes | -----           | MLVIL                     | GLVVL              | GTVFGGYLMTGG                    | -----                           | HLGALY                          | QPAELVIA                    | CAGIGSFIVG      | NNGKAIKGT     | TMKAIPL    | FRRSKYT          | ----    |       |       |    |    |    |    |  |  |
| Saen | -----           | MLVIL                     | GLVVL              | GTVFGGYLMTGG                    | -----                           | HLGALY                          | QPAELVIA                    | CAGIGSFIVG      | NNGKAIKGT     | TMKAIPL    | FRRSKYT          | ----    |       |       |    |    |    |    |  |  |
| Ypse | -----           | MLVIL                     | GLVVL              | GTVFGGYLMTGG                    | -----                           | HLGALY                          | QPAELVIA                    | CAGIGSFIVG      | NNGKAIKGT     | TMKAIPL    | FRRSKYT          | ----    |       |       |    |    |    |    |  |  |
| Ecol | -----           | MLILL                     | GLVVL              | GTVFGGYLMTGG                    | -----                           | SLGALY                          | QPAELVIA                    | CAGIGSFIVG      | NNGKAIKGT     | LKALPLLF   | FRRSKYT          | ----    |       |       |    |    |    |    |  |  |
| Efer | -----           | MLILL                     | GLVVL              | GTVFGGYLMTGG                    | -----                           | SLGALY                          | QPAELVIA                    | CAGIGSFIVG      | NNGKAIKGT     | LKALPLLF   | FRRSKYT          | ----    |       |       |    |    |    |    |  |  |

Function of the flagellum from *V. cholerae*

|      | 70       | 80                                                                                     | 90                           | 100        | 110        | 120               | 130       | 140      |
|------|----------|----------------------------------------------------------------------------------------|------------------------------|------------|------------|-------------------|-----------|----------|
| Vcho | ADAPED   | LAKIVEMADAARKGGFLALBEME                                                                | -----                        | IPNPFMQKGI | DLLVDG     | -HDADVVRATLQKDI   | VLTDERH   | SKGTQVFR |
| Vvul | ADEPED   | LAKIVEMADAARKGGFLALBEME                                                                | -----                        | ISNSFMQKGI | DLLVDG     | -HDADVVRALQKDI    | ALTDERHT  | QGTGVFR  |
| Vcar | SDEPED   | LAKVEMADAARKGGFLALBEME                                                                 | -----                        | ITNSFMQKGI | DLLVDG     | -HDADVVRALQKDI    | SLTDERHD  | SGCNVFR  |
| Vspl | ADEPED   | LAKVEMADAARKGGFLALBEME                                                                 | -----                        | ISNSFMQKGI | DLLVDG     | -HDADVVRALQKDI    | ALTDERHE  | QGAQVFS  |
| Vori | ADEPED   | LAKVEMADAARKGGFLALBEME                                                                 | -----                        | ITNGFMQKGI | DLLVDG     | -HDADVVRALQKDI    | VLTDERHD  | FGGSVFR  |
| Vmim | ADEPED   | LAKIVEMADAARKGGFLALBEME                                                                | -----                        | IPNPFMQKGI | DLLVDG     | -HDADVVRATLQKDI   | ALTDERH   | SKGTQVFR |
| Vfur | ADEPED   | LAKIVEMADAARKGGFLALBEME                                                                | -----                        | ISNSFMQKGI | DLLVDG     | -HDADVVRATLQKDI   | SLTDERH   | EAGTGVFR |
| Valg | ADEPED   | LAKIVEMADAARKGGFLALBEME                                                                | -----                        | INNFMQKGI  | DLLVDG     | -HDADVVRALQKDI    | ALTDERHT  | QGTGVFR  |
| Vhar | ADEPED   | LAKIVEMADAARKGGFLALBEME                                                                | -----                        | INNFMQKGI  | DLLVDG     | -HDADVVRALQKDI    | ALTDERHT  | QGTGVFR  |
| Vcor | VDEPED   | LAKVEMADAARKGGFLALBEME                                                                 | -----                        | ITNFMQKGI  | DLLVDG     | -HDADVVRALQKDI    | VLTDERHD  | FGASVFR  |
| Vpar | ADEPED   | LAKIVEMADAARKGGFLALBEME                                                                | -----                        | ITNSFMQKGI | DLLVDG     | -HDADVVRALQKDI    | ALTDERHD  | FGSNVFR  |
| Alvi | STAPTAL  | TEEAVLANIARREGLLALEGKQ                                                                 | -----                        | ISHPFLQGT  | ISLCLD     | -HPPEVQKVL        | SKDINLAI  | QRQEAQV  |
| Aehy | GDKLDD   | LAKAVELADAARKGGFLALBAAE                                                                | -----                        | IPNPFMQKGI | DMLVDG     | -HDADVVRAMEKDI    | ELTSEHVI  | IAVKVFR  |
| Sama | IDKPEEL  | TEQSVAMADAARKGGFLALBEAQ                                                                | -----                        | ISNSFMQKAV | DMLVDG     | -HDADVVRALQKDI    | ALTEERHRT | GIGIFR   |
| Bcer | EEDLEQL  | TEGFVFSKSKYKGLSLEADGEQ                                                                 | -----                        | IDNAFIQKGI | RLMLSG     | -YDEDELREIL       | TKDIEVY   | ELKKAELL |
| Rosp | AANPRDL  | TAETITNLGDIVRKSGPLGLENVD                                                               | -----                        | ISDPVLAKG  | VQYIAD     | -YETEFIKDS        | MERERDLN  | TRLSEGR  |
| Asal | TDEPVDL  | VTIVEMADAARKGGFLALBEKE                                                                 | -----                        | ISNSFMQKGI | DLLVDG     | -HDAEVKATLQKDI    | ALTNERHE  | KGIGVFT  |
| Sone | RTDLNERA | EFLIEIAGDVRKGGFLSIEDKIDQ                                                               | -----                        | IDDPFLHKG  | LELLVDG    | -YEKDNIVEI        | LEKEIEFE  | QHGIEQT  |
| Dbac | ADDEPTAL | IAQFSDYATRVRREGLLSLEBAHLKN                                                             | -----                        | IPDFELRKG  | QLTVDG     | -LDPQLIQE         | IMETFEIS  | CLEERHLK |
| Ghol | ADDPEDL  | LAKIVEMADAARKGGFLALBEME                                                                | -----                        | VPNFMKKG   | DMLVDG     | -HDAEVKMTLQKDI    | TMTDERH   | DAGAQQV  |
| Ppro | TDPNEDL  | LAKIVEMADAARKGGFLALBEME                                                                | -----                        | VDNFMKKG   | IDLLVDG    | -HDADVVRATLQKDI   | GLTNERHE  | KGVGIF   |
| Pssp | KIEPREL  | VENIAHLAETARKEGPIGLENVE                                                                | -----                        | IEEPTLAKG  | MQYVAD     | -YDYNLIRDS        | MEKERDLY  | TRLNEG   |
| Pssy | SDTPEEL  | LAKAVEMADAARKGGFLALBAAE                                                                | -----                        | ISNSFMQKAV | DMLVDG     | -HDADVVRATLQKDI   | ALTEERHRT | GIGIFR   |
| Bamy | DDNVKEL  | VRVFLAEQARRGGLSLEBQARE                                                                 | -----                        | IKDFLKKG   | LLLAIDG    | -WDEETIRLV        | MDSIAA    | MEERHRK  |
| Dede | SEDPKLE  | EQLVNFAVARRDGLALESAEAGE                                                                | -----                        | ISDFELKKG  | IRLAVDG    | -TEPEVIKSI        | LETELS    | MEERHKG  |
| Ptun | IESPDEL  | LEKAVELADARKGGFLALBAAE                                                                 | -----                        | IPNPFMQKGI | NMLVDG     | -HDADVVRATLQKDI   | ITLSTRH   | DAGSTL   |
| Bspc | EQSVGEL  | LIGIFVKLSERARREGLLSLEAIGK                                                              | -----                        | VEDPEFIQ   | KGIVLAVDG  | -IEPDVITD         | IMNAE     | IMAMEER  |
| Colp | LEKPEEL  | LEKAVDMADAARKGGFLALBAAE                                                                | -----                        | ITNPFMQK   | VDMMLVDG   | -HDADVVRATLQKDI   | INLTERH   | ETGSDMM  |
| Bsub | EDNVKDL  | VKTFSLSDHARKHGLSLEDDQTRE                                                               | -----                        | IKDFLKKG   | LLLAIDG    | -WDEETIRLV        | MDSIAA    | MEERHRK  |
| Iloi | IEHPQEL  | LDTAVEMADARKGGFLALBAAE                                                                 | -----                        | IPNPFMQK   | VDMMLVDG   | -HDAEVVRATLQKDI   | IKMSFAR   | HEEGAR   |
| Hche | LDKPEEL  | LEQSVVELADARKGGFLSLEGKE                                                                | -----                        | IPNAFLSKGI | QLLIDG     | -HDADVVRATLQKDI   | TKDRNL    | TVDRHQ   |
| Clle | EIDPTEV  | LISKINELALSARKEGFLALBETAQG                                                             | -----                        | MDDPELQKGI | QLLVDG     | -TDAELRSI         | LETETIA   | FVNRHKN  |
| Desa | VNNPQEV  | IAEIVNLAHVARKNGLIVLEQQP                                                                | -----                        | ITDFELKKA  | IMYCVDG    | -HEAEFIEE         | VLQK      | EVELTQ   |
| Bsel | ENDLEEL  | LDTFVLDSTRARREGLLALEAGLED                                                              | -----                        | VDDPEFIQ   | KGVLLAVDG  | -IEPDIKDI         | IMMAE     | EVVAME   |
| Spea | LDKPEEL  | LEQVISMADAARKGGFLALBAAE                                                                | -----                        | ISNSFMQKAV | DMLVDG     | -HDADVVRALQKDI    | ALTEERHRT | GIGIFR   |
| Niwa | TEKPEGI  | LKQAVEMAGTARKEGFLALEGWE                                                                | -----                        | IKNPFMQK   | GVTLVDG    | -HDPDVVRVMTDLRQTL | SRHEL     | GQKIFKA  |
| Nhal | AEKPEEI  | LKQALEMANTARKDGLALEBSWD                                                                | -----                        | IKNPFMQK   | GVTLVDG    | -HEPEMVR          | RVLMTEL   | RQTLERH  |
| Ttur | LPDPNML  | LDEIVALADEARKGGFLSLEGKE                                                                | -----                        | VSSDFLQ    | RGIQLLVDG  | -HDPDVVK          | TLLSID    | KNKAMER  |
| Coli | SSDPPEL  | LEKIVELANIARKEGMLALENQE                                                                | -----                        | IDNDFLDE   | GVKMLIDG   | -NSREVSV          | TVLSKDM   | QQTIERH  |
| Rspc | MVKPEDL  | LEIVELADGARKGGFLSLEGKE                                                                 | -----                        | TSSDFL     | SKGIQLLVDG | -HDPDVVK          | ALLNKM    | MRMSTR   |
| Vvul | ADEPED   | LAKIVEMADAARKGGFLALBEME                                                                | -----                        | ISNSFMQKGI | DLLVDG     | -HDADVVRALQKDI    | ALTDERHT  | QGTGVFR  |
| Ospc | SLNPEDI  | LAETVDLADAARKGGFLSLEDKT                                                                | -----                        | VSSDFMQ    | RGIQLLVDG  | -HDPDVVK          | MLLKKE    | SKLTHDR  |
| Sacd | LPDPNAL  | LEEVVALADEARKGGFLSLEGKE                                                                | -----                        | VSSDFLQ    | RGIQLLVDG  | -HDPDVVK          | ALLSKDK   | NQAV     |
| Fbal | LDKPEEL  | LQSVTMDAARKGGFLALBAAE                                                                  | -----                        | VNNSEMKK   | AVDLLVDG   | -HDAEVVRDALAKDIGL | TAEERH    | AAAGIDIF |
| Shdy | KAMYMDL  | LALLYRLMAKSRQMGMSLBERDIENPRESEIFASYPRIADSVMLDFEIVDYLRLLIISCHMNTFEIEALMDEEIEPHESEAEVPA  | NSLALVGDS                    |            |            |                   |           |          |
| Ecol | KAMYMDL  | LALLYRLMAKSRQMGMSLBERDIENPRESEIFASYPRILADSVMLDFEIVDYLRLLIISCHMNTFEIEALMDEEIEPHESEAEVPA | NSLALVGDS                    |            |            |                   |           |          |
| Cyou | KAMYMDL  | LALLYRLMAKSRQMGMSLBERDIENPRESEIFASYPRILADSVMLDFEIVDYLRLLIISCHMNTFEIEALMDEEIEPHESEAEVPA | NSLALVGDS                    |            |            |                   |           |          |
| Ypes | KALYMDL  | MALLYRLLAKSRQMGMSLBERDIENPRESEIFASYPRIMADKTLVEEITDYLRLLIVS                             | GNMNAFETIEALMDEEIEPHESEAEVPA | NSLALVGDS  |            |                   |           |          |
| Saen | KTYMDL   | LALLYRLMAKSRQMGMSLBERDIENPRESEIFASYPRILADSVMLDFEIVDYLRLLIISCHMNTFEIEALMDEEIEPHESEAEVPA | NSLALVGDS                    |            |            |                   |           |          |
| Ypse | KALYMDL  | MALLYRLLAKSRQMGMSLBERDIENPRESEIFASYPRIMADKTLVEEITDYLRLLIVS                             | GNMNAFETIEALMDEEIEPHESEAEVPA | NSLALVGDS  |            |                   |           |          |
| Ecol | KAMYMDL  | LALLYRLMAKSRQMGMSLBERDIENPRESEIFASYPRILADSVMLDFEIVDYLRLLIISCHMNTFEIEALMDEEIEPHESEAEVPA | NSLALVGDS                    |            |            |                   |           |          |
| Efer | KAMYMDL  | LALLYRLMAKSRQMGMSLBERDIENPRESEIFASYPRILADSVMLDFEIVDYLRLLIISCHMNTFEIEALMDEEIEPHESEAEVPA | NSLALVGDS                    |            |            |                   |           |          |

Function of the flagellum from *V. cholerae*

|      | TM-helix III PomA                      |                  |                                      |                                                                 |                                                                 |                                                  | TM-helix IV PomA |     |     |     |  |  |
|------|----------------------------------------|------------------|--------------------------------------|-----------------------------------------------------------------|-----------------------------------------------------------------|--------------------------------------------------|------------------|-----|-----|-----|--|--|
|      | 150                                    | 160              | 170                                  | 180                                                             | 190                                                             | 200                                              | 210              | 220 | 230 | 240 |  |  |
| Vcho | APAMGMI                                | GLVGLVAMLSNMDDPK | -SI                                  | GPAMAVALLT                                                      | TLYGAVLSNMVFFPI                                                 | ADKLALRRDQETLNRRLIMDGVLAIQDQGNPRVIDSYLKNYLNASKRI |                  |     |     |     |  |  |
| Vvul | APAMGMI                                | GLVGLVAMLSNMDDPK | -SI                                  | GPAMAVALLT                                                      | TLYGAILSNMVFPPADKLALRRDQETLNRRLIMDGVLAIQDQGNPRVIDSYLKNYLNESKRA  |                                                  |                  |     |     |     |  |  |
| Vcar | SPAMGMI                                | GLVGLVAMLSNMDDPK | -SI                                  | GPAMAVALLT                                                      | TLYGAILSNMVFPPADKLALRRDQETLNRRLIMDGVLAIQDQGNPRVIDSYLKNYLNESKRA  |                                                  |                  |     |     |     |  |  |
| Vspl | APAMGMI                                | GLVGLVAMLSNMDDPK | -AI                                  | GPAMAVALLT                                                      | TLYGAILSNMVFPPADKLALRRDQETLNRRLVMDGVLAIQDQGNPRVIDGYLKSYLENEGKRT |                                                  |                  |     |     |     |  |  |
| Vori | APAMGMI                                | GLVGLVAMLSNMDDPK | -AI                                  | GPAMAVALLT                                                      | TLYGAILSNMVFPPADKLALRRDQETLNRRLIMDGVLAIQDQGNPRVIDSYLKNYLNESKRA  |                                                  |                  |     |     |     |  |  |
| Vmim | APAMGMI                                | GLVGLVAMLSNMDDPK | -SI                                  | GPAMAVALLT                                                      | TLYGAVLSNMVFFPIADKLALRRDQETLNRRLIMDGVLAIQDQGNPRVIDSYLKNYLNASKRI |                                                  |                  |     |     |     |  |  |
| Vfur | APAMGMI                                | GLVGLVAMLSNMDDPK | -AI                                  | GPAMAVALLT                                                      | TLYGAVLSNMVFFPIADKLALRRDQETLNRRLIMDGVLAIQDQGNPRVIDSYLKNYLNESKRA |                                                  |                  |     |     |     |  |  |
| Valg | APAMGMI                                | GLVGLVAMLSNMDDPK | -AI                                  | GPAMAVALLT                                                      | TLYGAILSNMVFPPADKLALRRDQETLNRRLIMDGVLAIQDQGNPRVIDSYLKNYLNESKRA  |                                                  |                  |     |     |     |  |  |
| Vhar | APAMGMI                                | GLVGLVAMLSNMDDPK | -AI                                  | GPAMAVALLT                                                      | TLYGAVLSNMVFFPIADKLALRRDQETLNRRLIMDGVLAIQDQGNPRVIDSYLKNYLNESKRA |                                                  |                  |     |     |     |  |  |
| Vcor | APAMGMI                                | GLVGLVAMLSNMDDPK | -AI                                  | GPAMAVALLT                                                      | TLYGAILSNMVFPPADKLALRRDQETLNRRLIMDGVLAIQDQGNPRVIDSYLKNYLNESKRA  |                                                  |                  |     |     |     |  |  |
| Vpar | APAMGMI                                | GLVGLVAMLSNMDDPK | -AI                                  | GPAMAVALLT                                                      | TLYGAILSNMVFPPADKLALRRDQETLNRRLIMDGVLAIQDQGNPRVIDSYLKNYLNESKRA  |                                                  |                  |     |     |     |  |  |
| Alvi | APAMGMI                                | GLVGLVAMLSNMDDPK | -AI                                  | GPAMAVALLT                                                      | TLYGAVLANAVATPIAEKLLRSGEKLAKTILEISIGIQEGLNPRVLEQLLMTYLPFHQOQ    |                                                  |                  |     |     |     |  |  |
| Aehy | GPAMGMI                                | GLVGLVAMLSNMDDPK | -SI                                  | GPAMAVALLT                                                      | TLYGAILSNMVFPPADKLALRRDQETLNRRLIMDGVLAIQDQGNPRVIDSYLKNYLNESKRA  |                                                  |                  |     |     |     |  |  |
| Sama | APAMGMI                                | GLVGLVAMLSNMDDPK | -SI                                  | GPAMAVALLT                                                      | TLYGAILSNMVFPPADKLALRRDQETLNRRLIMDGVLAIQDQGNPRVIDSYLKNYLNESKRA  |                                                  |                  |     |     |     |  |  |
| Bcer | APAMGMI                                | GLVGLVAMLSNMDDPK | -AI                                  | GPAMAVALLT                                                      | TLYGAVLSNMVFFPIADKLALRRDQETLNRRLIMDGVLAIQDQGNPRVIDSYLKNYLNESKRA |                                                  |                  |     |     |     |  |  |
| Rosp | APAFGMI                                | GLVGLVAMLSNMDDPK | -AI                                  | GPAMAVALLT                                                      | TLYGAVLSNMVFFPIADKLALRRDQETLNRRLIMDGVLAIQDQGNPRVIDSYLKNYLNESKRA |                                                  |                  |     |     |     |  |  |
| Asal | APAMGMI                                | GLVGLVAMLSNMDDPK | -SI                                  | GPAMAVALLT                                                      | TLYGAVLSNMVFFPIADKLALRRDQETLNRRLIMDGVLAIQDQGNPRVIDSYLKNYLNESKRA |                                                  |                  |     |     |     |  |  |
| Sone | CPMTGIVGAVFGLTHAMGLLDAPD               | -KLG             | GAIAVAFIAT                           | TLYGAVLSNMVFFPIADKLALRRDQETLNRRLIMDGVLAIQDQGNPRVIDSYLKNYLNESKRA |                                                                 |                                                  |                  |     |     |     |  |  |
| Dbac | APAMGMI                                | GLVGLVAMLSNMDDPK | -AI                                  | GPAMAVALLT                                                      | TLYGAVLSNMVFFPIADKLALRRDQETLNRRLIMDGVLAIQDQGNPRVIDSYLKNYLNESKRA |                                                  |                  |     |     |     |  |  |
| Ghol | APAMGMI                                | GLVGLVAMLSNMDDPK | -AI                                  | GPAMAVALLT                                                      | TLYGAVLSNMVFFPIADKLALRRDQETLNRRLIMDGVLAIQDQGNPRVIDSYLKNYLNESKRA |                                                  |                  |     |     |     |  |  |
| Ppro | APAMGMI                                | GLVGLVAMLSNMDDPK | -SI                                  | GPAMAVALLT                                                      | TLYGAVLSNMVFFPIADKLALRRDQETLNRRLIMDGVLAIQDQGNPRVIDSYLKNYLNESKRA |                                                  |                  |     |     |     |  |  |
| Pssp | APAFGMI                                | GLVGLVAMLSNMDDPK | -AI                                  | GPAMAVALLT                                                      | TLYGAVLSNMVFFPIADKLALRRDQETLNRRLIMDGVLAIQDQGNPRVIDSYLKNYLNESKRA |                                                  |                  |     |     |     |  |  |
| Psys | APAMGMI                                | GLVGLVAMLSNMDDPK | -AI                                  | GPAMAVALLT                                                      | TLYGAVLSNMVFFPIADKLALRRDQETLNRRLIMDGVLAIQDQGNPRVIDSYLKNYLNESKRA |                                                  |                  |     |     |     |  |  |
| Bamy | APAMGMI                                | GLVGLVAMLSNMDDPK | -AI                                  | GPAMAVALLT                                                      | TLYGAVLSNMVFFPIADKLALRRDQETLNRRLIMDGVLAIQDQGNPRVIDSYLKNYLNESKRA |                                                  |                  |     |     |     |  |  |
| Dede | APAMGMI                                | GLVGLVAMLSNMDDPK | -SI                                  | GPAMAVALLT                                                      | TLYGAVLSNMVFFPIADKLALRRDQETLNRRLIMDGVLAIQDQGNPRVIDSYLKNYLNESKRA |                                                  |                  |     |     |     |  |  |
| Ptun | APAMGMI                                | GLVGLVAMLSNMDDPK | -AI                                  | GPAMAVALLT                                                      | TLYGAVLSNMVFFPIADKLALRRDQETLNRRLIMDGVLAIQDQGNPRVIDSYLKNYLNESKRA |                                                  |                  |     |     |     |  |  |
| Bspc | APAMGMI                                | GLVGLVAMLSNMDDPK | -AI                                  | GPAMAVALLT                                                      | TLYGAVLSNMVFFPIADKLALRRDQETLNRRLIMDGVLAIQDQGNPRVIDSYLKNYLNESKRA |                                                  |                  |     |     |     |  |  |
| Colp | APAMGMI                                | GLVGLVAMLSNMDDPK | -SI                                  | GPAMAVALLT                                                      | TLYGAVLSNMVFFPIADKLALRRDQETLNRRLIMDGVLAIQDQGNPRVIDSYLKNYLNESKRA |                                                  |                  |     |     |     |  |  |
| Bsub | APAMGMI                                | GLVGLVAMLSNMDDPK | -AI                                  | GPAMAVALLT                                                      | TLYGAVLSNMVFFPIADKLALRRDQETLNRRLIMDGVLAIQDQGNPRVIDSYLKNYLNESKRA |                                                  |                  |     |     |     |  |  |
| Iloi | SPAMGMI                                | GLVGLVAMLSNMDDPK | -AI                                  | GPAMAVALLT                                                      | TLYGAVLSNMVFFPIADKLALRRDQETLNRRLIMDGVLAIQDQGNPRVIDSYLKNYLNESKRA |                                                  |                  |     |     |     |  |  |
| Hche | APAMGMI                                | GLVGLVAMLSNMDDPK | -SI                                  | GPAMAVALLT                                                      | TLYGAVLSNMVFFPIADKLALRRDQETLNRRLIMDGVLAIQDQGNPRVIDSYLKNYLNESKRA |                                                  |                  |     |     |     |  |  |
| Cile | GPAMGMI                                | GLVGLVAMLSNMDDPK | -AI                                  | GPAMAVALLT                                                      | TLYGAVLSNMVFFPIADKLALRRDQETLNRRLIMDGVLAIQDQGNPRVIDSYLKNYLNESKRA |                                                  |                  |     |     |     |  |  |
| Desa | APAFGMI                                | GLVGLVAMLSNMDDPK | -AI                                  | GPAMAVALLT                                                      | TLYGAVLSNMVFFPIADKLALRRDQETLNRRLIMDGVLAIQDQGNPRVIDSYLKNYLNESKRA |                                                  |                  |     |     |     |  |  |
| Bsel | APAMGMI                                | GLVGLVAMLSNMDDPK | -AI                                  | GPAMAVALLT                                                      | TLYGAVLSNMVFFPIADKLALRRDQETLNRRLIMDGVLAIQDQGNPRVIDSYLKNYLNESKRA |                                                  |                  |     |     |     |  |  |
| Spea | APAMGMI                                | GLVGLVAMLSNMDDPK | -SI                                  | GPAMAVALLT                                                      | TLYGAVLSNMVFFPIADKLALRRDQETLNRRLIMDGVLAIQDQGNPRVIDSYLKNYLNESKRA |                                                  |                  |     |     |     |  |  |
| Niwa | APAMGMI                                | GLVGLVAMLSNMDDPK | -AI                                  | GPAMAVALLT                                                      | TLYGAVLSNMVFFPIADKLALRRDQETLNRRLIMDGVLAIQDQGNPRVIDSYLKNYLNESKRA |                                                  |                  |     |     |     |  |  |
| Nhal | APAMGMI                                | GLVGLVAMLSNMDDPK | -AI                                  | GPAMAVALLT                                                      | TLYGAVLSNMVFFPIADKLALRRDQETLNRRLIMDGVLAIQDQGNPRVIDSYLKNYLNESKRA |                                                  |                  |     |     |     |  |  |
| Ttur | APAMGMI                                | GLVGLVAMLSNMDDPK | -AI                                  | GPAMAVALLT                                                      | TLYGAVLSNMVFFPIADKLALRRDQETLNRRLIMDGVLAIQDQGNPRVIDSYLKNYLNESKRA |                                                  |                  |     |     |     |  |  |
| Coli | APAMGMI                                | GLVGLVAMLSNMDDPK | -SI                                  | GPAMAVALLT                                                      | TLYGAVLSNMVFFPIADKLALRRDQETLNRRLIMDGVLAIQDQGNPRVIDSYLKNYLNESKRA |                                                  |                  |     |     |     |  |  |
| Rspc | APAMGMI                                | GLVGLVAMLSNMDDPK | -AI                                  | GPAMAVALLT                                                      | TLYGAVLSNMVFFPIADKLALRRDQETLNRRLIMDGVLAIQDQGNPRVIDSYLKNYLNESKRA |                                                  |                  |     |     |     |  |  |
| Vvul | APAMGMI                                | GLVGLVAMLSNMDDPK | -SI                                  | GPAMAVALLT                                                      | TLYGAVLSNMVFFPIADKLALRRDQETLNRRLIMDGVLAIQDQGNPRVIDSYLKNYLNESKRA |                                                  |                  |     |     |     |  |  |
| Ospc | GPAMGMI                                | GLVGLVAMLSNMDDPK | -AI                                  | GPAMAVALLT                                                      | TLYGAVLSNMVFFPIADKLALRRDQETLNRRLIMDGVLAIQDQGNPRVIDSYLKNYLNESKRA |                                                  |                  |     |     |     |  |  |
| Sacd | APAMGMI                                | GLVGLVAMLSNMDDPK | -AI                                  | GPAMAVALLT                                                      | TLYGAVLSNMVFFPIADKLALRRDQETLNRRLIMDGVLAIQDQGNPRVIDSYLKNYLNESKRA |                                                  |                  |     |     |     |  |  |
| Fbal | APAMGMI                                | GLVGLVAMLSNMDDPK | -AI                                  | GPAMAVALLT                                                      | TLYGAVLSNMVFFPIADKLALRRDQETLNRRLIMDGVLAIQDQGNPRVIDSYLKNYLNESKRA |                                                  |                  |     |     |     |  |  |
| Shdy | LPAFGIVAAMVGVVHALGSADRPAAELCALIABAMVGF | FLLGILLAYGF      | ISPLATVLRQKSAETSKMMQCVKVTLLSNLNGYAPP | IAVEFGRKTYLSSERP                                                |                                                                 |                                                  |                  |     |     |     |  |  |
| Ecol | LPAFGIVAAMVGVVHALGSADRPAAELCALIABAMVGF | FLLGILLAYGF      | ISPLATVLRQKSAETSKMMQCVKVTLLSNLNGYAPP | IAVEFGRKTYLSSERP                                                |                                                                 |                                                  |                  |     |     |     |  |  |
| Cyou | LPAFGIVAAMVGVVHALGSADRPAAELCALIABAMVGF | FLLGILLAYGF      | ISPLATVLRQKSAETSKMMQCVKVTLLSNLNGYAPP | IAVEFGRKTYLSSERP                                                |                                                                 |                                                  |                  |     |     |     |  |  |
| Ypes | LPAFGIVAAMVGVVHALGSADRPAAELCALIABAMVGF | FLLGILLAYGF      | ISPLATVLRQKSAETSKMMQCVKVTLLSNLNGYAPP | IAVEFGRKTYLSSERP                                                |                                                                 |                                                  |                  |     |     |     |  |  |
| Saen | LPAFGIVAAMVGVVHALGSADRPAAELCALIABAMVGF | FLLGILLAYGF      | ISPLATVLRQKSAETSKMMQCVKVTLLSNLNGYAPP | IAVEFGRKTYLSSERP                                                |                                                                 |                                                  |                  |     |     |     |  |  |
| Ypse | LPAFGIVAAMVGVVHALGSADRPAAELCALIABAMVGF | FLLGILLAYGF      | ISPLATVLRQKSAETSKMMQCVKVTLLSNLNGYAPP | IAVEFGRKTYLSSERP                                                |                                                                 |                                                  |                  |     |     |     |  |  |
| Ecol | LPAFGIVAAMVGVVHALGSADRPAAELCALIABAMVGF | FLLGILLAYGF      | ISPLATVLRQKSAETSKMMQCVKVTLLSNLNGYAPP | IAVEFGRKTYLSSERP                                                |                                                                 |                                                  |                  |     |     |     |  |  |
| Efer | LPAFGIVAAMVGVVHALGSADRPAAELCALIABAMVGF | FLLGILLAYGF      | ISPLATVLRQKSAETSKMMQCVKVTLLSNLNGYAPP | IAVEFGRKTYLSSERP                                                |                                                                 |                                                  |                  |     |     |     |  |  |

250

```

.|....
Vcho LDVDKE-----
Vvul LDIND-----
Vcar LDVDNE-----
Vspl IDGEP-----
Vori LDVDNE-----
Vmim LDVDKE-----
Vfur LDVDNE-----
Valg LEIDE-----
Vhar LEIDE-----
Vcor LDVDNE-----
Vpar LDVDNE-----
Alvi SSKD-----
Aehy NGTE-----
Sama IDTTDGE-----
Bcer KEKRA-----
Rosp EFAEAA-----
Asal VDTGEE-----
Sone -----
Dbac VRS-----
Ghol VDVDG-----
Ppro VDVDG-----
Pssp DMIEAAA-----
Psys GGSTEDGAA-----
Bamy KG-QPSNKKKGAVHEA-----
Dede SQFE-----
Ptun VDTG-----
Bspc DLDKAVNEEEALDNEA-----
Colp VDTTDE-----
Bsub KQPNQVKTKKGSVHEA-----
Iloi GNEDEDE-----
Hche TEEA-----
Clle VFDVKNKDE-----
Desa NSMANR-----
Bsel KKDEEPEETEENE-----
Spea IDTLEGA-----
Niwa NGYGEKGR-----
Nhal NNGEK-----
Ttur VEAAE-----
Coli GDDG-----
Rspc GA-----
Vvul LDIND-----
Ospc AAEG-----
Sacd VADAD-----
Fbal IDTTED-----
Shdy SFIELEEHVRAVKNPQQQTTEEA-
Ecol SFIELEEHVRAVKNPQQQTTEEA-
Cyou SFIELEEHVRAVRNPAAQQTTEEA-
Ypes SFIELEEHVRRVKAPASQATEEDA-
Saen SFIELEEHVRAVRNPQNQQQTTEEA-
Ypse SFIELEEHVRRVKAPASQATEEDA-
Ecol SFIELEEHVRAVKNPQQQTTEEA-
Efer SFVELEEHVRAVKNPNQQATTEEV-

```

**Figure S6: Sequence alignment of PomA homologues.** Amino acid sequences of PomA homologues were obtained from NCBI BLAST<sup>®</sup>, algorithm blastp (protein-protein BLAST) with query sequence gi|51241595 PomA *V. cholerae*. A multiple sequence alignment of the 53 sequences was performed using the ClustalW algorithm (1) implemented in the BioEdit Sequence Alignment Editor (Version 7.0.5.3, (2)) with default settings. Identical and similar residues were identified with BioEdit using an identity and similarity threshold of 83% and BLOSUM62 (3) scoring matrix. Bacteria which are predicted to operate a Na<sup>+</sup>-dependent flagellar motor are shaded in light grey, bacteria which are predicted to operate a H<sup>+</sup>-dependent flagellar motor are shaded in dark grey. Vcho *Vibrio cholerae* (gi|51241595); Vvul *Vibrio vulnificus* (gi|27363787); Vcar *Vibrio caribbenthicus* (gi|312884944); Vspl *Vibrio splendidus* (gi|84394352); Vori *Vibrio orientalis* (gi|261252276); Vmim *Vibrio mimicus* (gi|258621631); Vfur *Vibrio furnissii* (gi|260767265); Valg *Vibrio alginolyticus* (gi|91225059); Vhar *Vibrio harveyi* (gi|153835782); Vcor *Vibrio coralliilyticus* (gi|260776527); Vpar *Vibrio parahaemolyticus* (gi|254509022); Alvi *Allochromatium vinosum* (gi|288942519); Aehy *Aeromonas hydrophila* (gi|117620588); Sama *Shewanella amazonensis* (gi|119775567); Bcer *Bacillus cereus* (gi|152975139); Rosp *Roseibium sp.* (gi|307944456); Asal *Aliivibrio salmonicida* (gi|209694504); Sone *Shewanella oneidensis* (gi|24375769); Dbac *Desulfomicrobium baculatum* (gi|256830502); Ghol *Grimontia hollisae* (gi|262274768); Ppro *Photobacterium profundum* (gi|90410907); Pssp *Pseudovibrio sp.* (gi|254473242); Psys *Psychromonas sp.* (gi|90408166); Bamy *Bacillus amyloiquefaciens* (gi|308174664); Dede *Deferribacter desulfuricans* (gi|291280095); Ptun *Pseudoalteromonas tunicata* (gi|88859187); Bspc *Bacillus sp.* (gi|319651876); Colp *Colwellia psychrerythraea* (gi|71279500); Bsub *Bacillus subtilis* (gi|296332049); Iloi *Idiomarina loihiensis* (gi|56461235); Hche *Hahella chejuensis* (gi|83648503); Clle *Clostridium lentocellum* (gi|296440180); Desa *Desulfurivibrio alkaliphilus* (gi|297569176); Bsel *Bacillus selenitrireducens* (gi|297583573); Spea *Shewanella pealeana* (gi|157962806); Niwa *Nitrosococcus watsoni* (gi|300114850); Nhal *Nitrosococcus halophilus* (gi|292492680); Ttur *Teredinibacter turnerae* (gi|254787124); Coli *Congregibacter litoralis* (gi|88704265); Rspc *Reinekea sp.* (gi|88799580); Ospc *Oceanospirillum sp.* (gi|89093475); Sacd *Saccharophagus degradans* (gi|90022861); Fbal *Ferrimonas balearica* (gi|308048594); Shdy *Shigella dysenteriae* (gi|82776485); Ecol *Escherichia coli* (gi|89108730); Nimo *Nitrococcus mobilis* (gi|88812419); Cyou *Citrobacter youngae* (gi|291085222); Ypes *Yersinia pestis* (gi|145599065); Saen *Salmonella enterica* (gi|161502955); Ypse *Yersinia pseudotuberculosis* (gi|51596730); Efer *Escherichia fergusonii* (gi|218548502).



Function of the flagellum from *V. cholerae*

```

          90          100          110          120          130          140
...|...|...|...|...|...|...|...|...|...|...|...|...|...|...|
Vcho PIDVIMQQTIDITQQTLEFQEGESDRAGGNQRDSGQLTGGQSAETSVQDSQNTQSEMQQQ-----
Valg PIDVIMQQTMDITQQTLEFHEGESDRAGGTRDEGKLTGGQSPETSTQNNESAADMQQQ-----
Vcor PIDVIMQQTIDITQQTLEFHEGESDRAGGTQRDKGKLTGGKSPDTSTQDSQNSSESSEQQ-----
Vfis PIEVIMQQTIDIPQKTLDFHGDGESDRAGGTRKREAGKQTGGESPSNSTQTSASQ-----N-----
Vfur PIDVIMQQTMDITQQTLEFHEGADDRAGGTQRDAGQLTGGQSPETATQDNQNTETEMQQQQ-----
Vhar PIDVIMQQTMDITQQTLEFHEGESDRAGGTRDQKLTGGQSPETSTHNNQSAESDMQQQ-----
Vmet PIDVIMQQTIDITQQTLEFHEGSDRAGGNQRDDGQLTGGESPETSTEDSQDNEDAEQEQE-----
Vmim PIDVIMQQTIDITQQTLDQEGSDRAGGNQRDSGKLTGGQSAESSTQDNQNTQSEMQQQ-----
Vori PIDVIMQQTIDITQQTLEFHEGESDRAGGTQRDQKLTGGQSPDTSTQNNQNSSESQSQ-----
Vpar PIDVIMQQTMDITQQTLEFHEGESDRAGGTRDEGKLTGGQSPETSTQSNQSAESDMQQQ-----
Vspl PIDVIMQQTIDITQQTLEFHEGESERAGGTRDQKMTGGKSPVSTHDNQNSESQSQ-----
Vvul PIDVIMQQTIDITQQTLEFHEGESDRAGGTQRDQKMTGGQSPETSTQTNQNTQEQQQQQ-----
Bpsc EVEKASAAGTLEEGQNDMEAEGKIQLTKD-----
Bcoa KNDAQKNGDSTTNGSKSNSTTDASNGQGD-----
Bpse FSEEGSNTD-----
Bsel PFESHMEMD-----
Hche PLQTIMQQTMDLFPN-LEQLCEQQVADALQECPKVQGEELSDIVLEKIK-----
Rspc PLNVVRQDTVADLKDSLILCQDTFTMQEEAQGDQGG-----MTRQVIISD-----
Ospc PLNEVRQMTVNNDMNTLDIRSKEGSDSDPDQE-----AGEQQELQK-----
Svico PIEIINQQTNEMTEPILEFYQAGDDDSAGGVQQQRGEQRGGEASATAQEQDEAKAESKAESKAKA-----
Ssed PIEIINQQTNEMTEPVLEFYQAGDDDSGGVQQQRGEQRGGEASATAQEEAESKSESKSEAEAKAKS-----
Sone PIEIINQQTNEMTEPVLDLQAGEDDSSGGTQQQNGSQRGGEASATAQETEDAVK-----
Abac PIETIQQTIVEMTQQMLEFQAGDESSAGGRQEQRGDKRGGESRSTSQEQ-----
Phal PIETIQQTIVEMTQQMLEFQAGDESSAGGRQEQRGDKRGGESRSTSQEQ-----
Amac PIESIQQTINEMTQQMLEFQAGNEDSAGGRQKQGEQRGGQSQQTATQS-----
Fbal PIEVIQQQTVEFTRDMLNYQPGESDQAGGQQNQSGNSRGGTSSQTANQPRAEQSN-----
Asal PIEVIMQQTIDIPQKTLDFHGDGESDRAGGSKREAGNLTGGESSTSTQTNASQ-----D-----
Ppro PIEVIMQQTIDMTQRTLDHGDGESDRAGGTRDAGKLTGGQSAADVATQMNQNN-----Q-----
Psys PIEVIMQQTIEMTQAKLDFSEGDSSRADGEEDSKEDIPEEGNQGN-----
Iloi PIETIQQTIVEMTQQMLEFQEGESDFAGGQQTERGGQESDSADDQKEAEAEN-----
Rspc VTEQMTQDTTETEPEIQRVTEEDGKGAEEGEGADAPGQSEAREMAEALQEALQSGQVKVESREGEVVMTFDAPDAQSLPGQLTEAAEALQQAEEATGQ
Shdy VNKQPNIIEELKKRMEQSRLR-----
Shso VNKQPNIIEELKKRMEQSRLR-----
Ecol VNKQPNIIEELKKRMEQSRLR-----
Saen VEKQPNIDELKKRMEQSRLN-----
Cyou VNKQPNIIDDLKKRMEQSRLS-----
Ypse VRKQINSEESRQ--EIHRLN-----
Ypes VRKQINSEESRQ--EIHRLN-----
Spro VKRQIDTLEKRD--EELRLN-----

```

Function of the flagellum from *V. cholerae*

|      | 150                | 160                                      | 170                           | 180           | 190                | 200                | 210     |
|------|--------------------|------------------------------------------|-------------------------------|---------------|--------------------|--------------------|---------|
| Vcho | -----              | QAQAMSEQMETVAESIKKALSREIEQGAIEVENLGQQID  | IRIREKGA                      | FPEGSAFL      | QPKFRPLVRQIAELVK   |                    |         |
| Valg | -----              | QSKEMSQEMETLMESIKKALEREIEQGAIEVENLGQQIV  | IRMREKGA                      | FPEGSAFL      | QPKFRPLVRQIAELVK   |                    |         |
| Vcor | -----              | QSAELSQELLETLMESIKKALEREIEQGAIEVENLGQQID | IRIREKGA                      | FPEGSAFL      | QPKFRPLVRQIAELVK   |                    |         |
| Vfis | -----              | SESESTQSQQELEDTIKKALEREISEGAI EVENLGQQLV | IRIREKGA                      | FAPGSAFL      | QPKFRPLVRQIAELVK   |                    |         |
| Vfur | -----              | AQSQSMSEEMETVLESIKKALQREIEQGAIEVENLGQQIV | IRIREKGA                      | FPEGSAFL      | QPKFRPLVRQIAELVK   |                    |         |
| Vhar | -----              | QSEQTSQEMETLMESIKKALEREIEQGAIEVENLGQQIV  | IRMREKGA                      | FPEGSAFL      | QPKFRPLVRQIAELVK   |                    |         |
| Vmet | -----              | QSEALSEEMEIVLENIKKALDREIEQGAIEVENLGQQIL  | IRIREKGA                      | FPEGSAFL      | QPKFRPLVRQIAELVK   |                    |         |
| Vmim | -----              | QAKAMSEQMETVAESIKKALSREIEQGAIEVENLGQQID  | IRIREKGA                      | FPEGSAFL      | QPKFRPLVRQIAELVK   |                    |         |
| Vori | -----              | QSAEMSQELETLMESIKKALEREIEQGAIEVENLGQQID  | IRIREKGA                      | FPEGSAFL      | QPKFRPLVRQIAELVK   |                    |         |
| Vpar | -----              | QSKEMSQEMETLMESIKKALEREIEQGAIEVENLGQQIV  | IRMREKGA                      | FPEGSAFL      | QPKFRPLVRQIAELVK   |                    |         |
| Vspl | -----              | QAEAQSQEMETLMESIKKALEREIDQGAIEVENLGQQIV  | IRIREKGA                      | FPEGSAFL      | QPKFRPLVRQIAELVK   |                    |         |
| Vvul | -----              | QSEAMSKEMETLMESIKKALEREIEQGAIEVENLGQQIV  | IRMREKGA                      | FPEGSAFL      | QPKFRPLVRQIAELVK   |                    |         |
| Bspc | -----              | QELKEVEKVKTYIQNGLTDKLETSLTDEGLLVT        | IRDNVL                        | FD            | SGKAEVRKEDIKTAKALS | SNLLV              |         |
| Bcoa | -----              | AQLKETQQRINTYIAHNKLEKGFETSLTGEGLL        | IT                            | IRDNVL        | FD                 | SGKAEVRKEDIKTAKALS | SNLLV   |
| Bpse | -----              | EVDM---                                  | DELLEEVQEFLEVNMENDVISATRDDR   | GVVLVLQERTL   | ETAEAE             | LLDSAE             | PFLKVG  |
| Bsel | -----              | EVEMSEQLDDLLLEVNEFIEDNDLTENISATRDDR      | GVVLVLQEQAL                   | ETAEAE        | LLDSAE             | PFLKVG             | TLVT    |
| Hche | -----              | MLVEETENDAITLASALESEVRNNQVEVETRGRK       | IV                            | IRVQEK        | GS                 | SSGSAFL            | NPFPYV  |
| Rspc | -----              | EAMQELDEEAARIAQALSDEIAEGLQIETVNETI       | IRVKEQ                        | ---           | SFTGGSDY           | VADEF              | LPVLDK  |
| Ospc | -----              | EQEQEAKKEAVEFAAALAEETIGDGSVEVETD         | GKII                          | IRI           | KEKGS              | F                  | SSGSAFL |
| Svio | -----              | EEESKAQAAAQENINDQVKMAMELNKEIVDGAIE       | IESL                          | GQQI          | IRIREKGA           | F                  | SSGSAFL |
| Ssed | -----              | EEESKAQAAAQDQINDEVKMAQELNKEIVDGAIE       | IESL                          | GQQI          | IRIREKGA           | F                  | SSGSAFL |
| Sone | -----              | AEAAAQDKINQOVKMAQELNQEIADGAIEIESL        | GQQI                          | IRIREKGS      | F                  | SSGSAFL            | QPRFKP  |
| Abac | -----              | SSEQAISAADQEQTNELVKKIAQQLERQIIDGAI       | ELES                          | GQQI          | IRIRENGS           | F                  | SSGSAFL |
| Phal | -----              | ASEQAISAADQQQTNDLVKKIAQQLERQIIDGAI       | ELES                          | GQQI          | IRIRENGS           | F                  | SSGSAFL |
| Amac | -----              | SSS-AEQSTDQSMAELMKKVAQQLERQIIDGAI        | ELES                          | GQQI          | IRIRENGS           | F                  | SSGSAFL |
| Fbal | -----              | QSQTRTSASDADNVNELTKKIAQQLERQIIDGAI       | ELES                          | GQQI          | IRIREKGA           | F                  | SSGSAFL |
| Asal | -----              | AESQSQNSQEQLEETIKKALEREIAEGAVEVENL       | GQQLV                         | IRIREKGA      | F                  | SSGSAFL            | QPKFRPL |
| Ppro | -----              | SE--MSESQELLEVMQKALDREIQDGAIEVENF        | GQVV                          | IRI           | KEKGA              | F                  | SSGSAFL |
| Psys | -----              | EQSSEASEAQHLAKAVAQELQDEIQEAGIEIESL       | GQQL                          | IRI           | REKGA              | F                  | SSGSAFL |
| Iloi | -----              | TEAMTQVSKELMRRIERQLENEIKAGTIELEQH        | GQQI                          | IRI           | REKGS              | F                  | SSGSAFL |
| Rspc | STSDVMMQGLADNIQEMA | EVMMQKAEAE                               | TQAGQSARSA                    | AIAADQALQVALQ | QIEGELV            | SVEQRE             | DKVVI   |
| Shdy | -----              | KLRGDL                                   | DQLIESDPKLRALRPHLKIDLVQ       | EGLRIQ        | IDSQNR             | PMERT              | GSAD    |
| Shso | -----              | KLRGDL                                   | DQLIESDPKLRALRPHLKIDLVQ       | EGLRIQ        | IDSQNR             | PMERT              | GSAD    |
| Ecol | -----              | KLRGDL                                   | DQLIESDPKLRALRPHLKIDLVQ       | EGLRIQ        | IDSQNR             | PMERT              | GSAD    |
| Saen | -----              | KLRGDL                                   | DQLIESDPKLRALRPHLKIDLVQ       | EGLRIQ        | IDSQNR             | PMERT              | GSAD    |
| Cyou | -----              | KLRGDL                                   | DQLIESDPKLRALRPHLKIDLVQ       | EGLRIQ        | IDSQNR             | PMERT              | GSAD    |
| Ypse | -----              | KLREKL                                   | DQLIESDPRLKALRPHLLINMMDEGLRIQ | IDSQNR        | PMKMGSAQ           | VEPYMR             | DILRAI  |
| Ypes | -----              | KLREKL                                   | DQLIESDPRLKALRPHLLINMMDEGLRIQ | IDSQNR        | PMKMGSAQ           | VEPYMR             | DILRAI  |
| Spro | -----              | KLREKL                                   | DELIESDPRLKALRPHLLINMMDEGLRIQ | IDSQNR        | PMKMGSAQ           | VEPYMR             | DILRAI  |



Function of the flagellum from *V. cholerae*

```

      220      230      240      250      260      270      280      290
Vcho  . . . . | . . . . | . . . . | . . . . | . . . . | . . . . | . . . . | . . . .
Valg  DVEG-KVRVTGHTDNQKLD-SELYRSNWDLSSQRAVSAQEMEKVKDFDHLRLQVRGLADTQPLGPNDE-AQRATNRRVEISILQG-----
Vcor  DVEG-IVRVSGHTDNQRLD-SELYRSNWDLSSQRAVSAQEMEKVRDFSHQRLQVRGMADTQPLGPNDE-AQRSRNRRVEISIMQG-----
Vfis  DVEG-IIRVSGHTDNQPLD-SELYRSNWDLSSQRAVSAQEMERVKGFESDRLRVRGMASTEPLVSNKTA-EGRARNRRVEISIMQG-----
Vfur  DVEG-IVRVSGHTDNQRLD-SELYRSNWDLSSQRAVSAQEMEKVGFNHQRLQVRGMADTQPLGPNDE-AQRSRNRRVEISIMQG-----
Vhar  DVEG-IVRVSGHTDNQPLD-SELYRSNWDLSSQRAVSAQEMEKVRGFSHQRLRVRGMADTEPLAPNDS-ANRALNRRVEISIMQG-----
Vmet  DVEG-IVQVTGHTDNQRLD-SELYRSNWDLSSQRAVSAQEMERVTFDHRRLQVRGLADTAPVGPNDTE-AQRSRNRRVEISIMQG-----
Vmim  DVEG-KVRVTGHTDNQKLD-SELYRSNWDLSSQRAVSAQEMEKVKGFHDHRLQVRGMADTQPLGPNDE-AQRALNRRVEISILQG-----
Vori  DVEG-RIRVSGHTDNQRLD-SELYRSNWDLSSQRAVSAQEMEKVRGFNHERLRVRGMADTEPLGPNDE-AQRSRNRRVEISIMQG-----
Vpar  DVEG-IVRISGHTDNQRLD-SELYRSNWDLSSQRAVSAQEMEKVRGFSHQRLRVRGMADTEPLVPNDS-ENRALNRRVEISIMQG-----
Vspl  DVEG-IVRISGHTDNQRLD-SELYRSNWDLSSQRAVSAQEMEKVRGFSHQRLRVRGMADTEPVEPNDE-WQRLNRRVEISIMQG-----
Vvul  DVEG-IVRISGHTDNQRLD-SELYRSNWDLSSQRAVSAQEMEKVRGFSHQRLRVRGMADTDPVNDTE-ENRARNRRVEISIMQG-----
Bspc  MDPPRNIIISGHTDNMPIK-NSEFESNWELSMRANVMFKILLHNKLLDARAFSAKGFGEFQPAASNDTK-EGRDKNRRVEIILPR-----
Bcoa  MDPPRSIIISGHTDNVPIH-NSVFQSNWELSMRATNFKIILLENKLNPKYFSAKGFGEYHPIASNDTQ-GGRAKNRRVEIILPK-----
Bpse  AIDPN-MVKVEGHTDSRPIS-NFRYPSNWELSGARASSVIRYLVEFNLDLDPKRFIATGYGDTREPVVNTTV-ENLQLNRRVVIISDP-----
Bsel  TVEN-MVKVEGHTDSRPIN-TVQFPSNWELSGARASSVIRFILLSNFVDERRFLAVGYGETRPVAPNTTP-DNLQNNRRVVIISDP-----
Hche  SMEG-SISVEGHTDSIPIR-TARFRSNWDLSSARALEVAHEMLFESGELEPSRFSIAGYADTKPLAPNDS-ENRARNRRVEIILQPLDDETKKEIQAR
Rspc  TVEG-DIWEVGHGHTDNVPIA-TSQRNNWLLSARALVAEYLFIAPEMAEERTFIVGHGSKTPIASNETP-EGRAQNRRVEIILKPK-----NPDY
Ospc  DVKG-NVSIEGHTDNIPYA-GRRFESNWELSVARALVAHELFQDPRIDQSRFKVLMADTKPLVPNDTR-ANRVKNRRVEIILVTKG-----
Svio  DVEG-IVTVSGHTDDMHIS-NELYSSNWDLSSKRAVAVAHELKVKGFQNRMKVVMANSAPLVNDNSA-SNRSRNRVEIATAEQG-----
Ssed  DVEG-IVTVSGHTDDMRIS-NELYSSNWDLSSKRAVAVAHELIRVKGFDQRRMKVVMANSAPLVNDNS-ENRARNRRVEIATAEQG-----
Sone  DVEG-IITVSGHTDDMQIS-DELYSSNWDLSSKRAVAVADVLLQVKGFDPKRMKVMASNNPIVPNDSP-DNRARNRRVEIATAEQG-----
Abac  DVEG-EITVSGHTDDFQVS-NELYVNNWDLSSKRAVAVASELQTVQGFQDKTRMMVVGRAETRPVLPNETN-EDRRRNRRVEISILQG-----
Phal  DVEG-EITVSGHTDDFQVS-NELYINNWDLSSKRAVAVASELQVVGFDKNRMMVVGRAETRPVLPNDSN-EDRRRNRRVEISILQG-----
Amac  DVEG-EIEISGHTDQGHA-NELYRSNWDLSSQRAVAEAMRTAPGFDESMSVVEKADTAPIVENATTSADRAKNRRVEIINQG-----
Fbal  DVEG-IISVTGHTDNTTID-NELYRSNWELSTQRAVSAHELVKVEGFDPRMELRVAENEPVSNDTW-EGRVNRNRVEIITINQG-----
Asal  DVEG-IIRVSGHTDNQPLE-SELYRSNWDLSSQRAVSAQEMELRVKGFNSDRLRVRGMASTEPLGPNKTA-AQRARNRRVEISIMQG-----
Ppro  DVEG-IIRISGHTDNQKLD-SELYRSNWDLSSQRAVSAQEMEQVKGFDHKRLRVVGLADTAPLNSNKTA-EERKVNRRVEISIMQG-----
Psys  DVEG-VITISGHTDNEQVH-SELYRSNWDLSSQRAVSAHEMLKIKKIRNKHLVVAGYANSKPLTDSKIL-SERKRNRRVEIIMQ-----
Iloi  DVEG-EVTISGHTDNEKLV-SELYSSNWDLSSKRAVAVAEEMLKVDVDFSEDRLVVMGYSDTKPLVPNNSE-ENRKNRRVEISIMQG-----
Rspc  GEAS-EIVVTGHTDSVPLGGASPYRDWGLAAARASSVRELSGSLIEPERLTATSREGSLPVAENDTA-AGRAQNRRVEIETITY-----
Shdy  GIPN-RISLSGHTDDFPYASGEKGYSNWELSDRANASRRELVMGGLDSGKVLRVVGMATMRLSDRGPD---DAVNRRISLVLNKAQAEAILHENAES
Shso  GIPN-RISLSGHTDDFPYASGEKGYSNWELSDRANASRRELVMGGLDSGKVLRVVGMATMRLSDRGPD---DAVNRRISLVLNKAQAEAILHENAES
Ecol  GIPN-RISLSGHTDDFPYASGEKGYSNWELSDRANASRRELVMGGLDSGKVLRVVGMATMRLSDRGPD---DAVNRRISLVLNKAQAEAILHENAES
Saen  GIPN-RISLAGHTDDFPYANGKGYSNWELSDRANASRRELVAAGGLDNGKVLRVVGMATMRLSDRGPD---DAINRRISLVLNKAQAEAILHENAES
Cyou  GIPN-RISLSGHTDDFPYANGKGYSNWELSDRANASRRELVMGGLDNGKVLRVVGMATMRLSDRGPE---DAINRRISLVLNKAQAEAILHENAES
Ypse  DIPN-KLSLSGHTDDLPHYARGERGYSNWELSDRANASRRELLAGGLDEGKILRVVGMATMRLKEQASD---DPVNRRISLVLNKAQAEAILHENAES
Ypes  DIPN-KLSLSGHTDDLPHYARGERGYSNWELSDRANASRRELLAGGLDEGKILRVVGMATMRLKEQASD---DPVNRRISLVLNKAQAEAILHENAES
Spro  DIPN-KISLSGHTDDIPYATGERGYSNWELSDRANASRRELLAGGLSEGKVLRVVGMATMRLKQHGAD---DAINRRITVLNKAQAEAILHENGES

```

Function of the flagellum from *V. cholerae*

```

      300      310
      |...|...|...|
Vcho  ---DPVYSDEVPSLDGGQQ-----
Valg  ---EPLYSEEVVPIQ-----
Vcor  ---EPLYSDEVPSLPSTN-----
Vfis  ---KPHESEVPSAQP-----
Vfur  ---EPLYSDEVPSAQTNAQ-----
Vhar  ---EPLYSEEVVPIQ-----
Vmet  ---KPLLSEEIPLSQ-----
Vmim  ---DPLYSDEVPSLGAPANQ-----
Vori  ---EALLSDEIPVNQ-----
Vpar  ---EPLYSEEVVPIQ-----
Vspl  ---EPLYSDEVVPIGQ-----
Vvul  ---EPLYSDEIPAIPQDQ-----
Bspc  ---T-----
Bcoa  ---NEKGNDW-----
Bpse  ---TYSEEDAF-----
Bsel  ---SYDESELF-----
Hche  DVAPGILPSDQSEEWQG-----LAPDEIF-----
Rspc  VTPPDEIDEPEPVDPGDPSPFLGLDPEEIF-----
Ospc  KDKESLEKIQARKEGDPDGLINLQDDIF-----
Svio  ---KPKYSDEILVGQ-----
Ssed  ---KPKESDEILVGQ-----
Sone  ---KAKESEEIQVDKPN-----
Abac  ---KAKESDPIDVR-----
Phal  ---KAKESDPIDVR-----
Amac  ---KPMISKPISVVDE-----
Fbal  ---KAKESEEIIRVLP-----
Asal  ---KPYESDEVVPAKN-----
Ppro  ---KPHYSDEVTSADIQKSAE-----
Psys  ---EATESGEIGIDK-----
Iloi  ---KAAESDPVDVID-----
Rspc  -----
Shdy  QNEPVSALEKPEVAPQVSVPTMPSAEPR-----
Shso  QNEPVSALEKPEVAPQVSVPTMPSAEPR-----
Ecol  QNEPVSALEKPEVAPQVSVPTMPSAEPR-----
Saen  QNEPVSVLQQPAAVPPASVPTSPQAEPR-----
Cyou  QNEPVSVLQRPaelPPVSVPTSPANPR-----
Ypse  RALDIEKATGLKQIDTHGTVPVAAVTPSSAITQSSAITQSSAAIPSPAVIPSSVTTQSATTIRSATTIRSATTIQATATTQAVTTTRSATTQASAVALS
Spro  RALDIEKATGLKQIDTHGTVPVAAVTPSSAVTQSSAITQSSAITQSSAITPSSAAIPSPAVIPSS-----VTTQSATTQASAVALS
      NSIEVAQPVELKSLAPAATAPATLIAPEQPAADPVPTNSDSQQR-----

```

Function of the flagellum from *V. cholerae*

|      | 510    | 520   | 530    | 540   | 550   | 560    | 570    |
|------|--------|-------|--------|-------|-------|--------|--------|
| Vcho | .....  | ..... | .....  | ..... | ..... | .....  | .....  |
| Valg | -----  | ----- | -----  | ----- | ----- | -----  | -----  |
| Vcor | -----  | ----- | -----  | ----- | ----- | -----  | -----  |
| Vfis | -----  | ----- | -----  | ----- | ----- | -----  | -----  |
| Vfur | -----  | ----- | -----  | ----- | ----- | -----  | -----  |
| Vhar | -----  | ----- | -----  | ----- | ----- | -----  | -----  |
| Vmet | -----  | ----- | -----  | ----- | ----- | -----  | -----  |
| Vmim | -----  | ----- | -----  | ----- | ----- | -----  | -----  |
| Vori | -----  | ----- | -----  | ----- | ----- | -----  | -----  |
| Vpar | -----  | ----- | -----  | ----- | ----- | -----  | -----  |
| Vspl | -----  | ----- | -----  | ----- | ----- | -----  | -----  |
| Vvul | -----  | ----- | -----  | ----- | ----- | -----  | -----  |
| Bspc | -----  | ----- | -----  | ----- | ----- | -----  | -----  |
| Bcoa | -----  | ----- | -----  | ----- | ----- | -----  | -----  |
| Bpse | -----  | ----- | -----  | ----- | ----- | -----  | -----  |
| Bsel | -----  | ----- | -----  | ----- | ----- | -----  | -----  |
| Hche | -----  | ----- | -----  | ----- | ----- | -----  | -----  |
| Rspc | -----  | ----- | -----  | ----- | ----- | -----  | -----  |
| Ospc | -----  | ----- | -----  | ----- | ----- | -----  | -----  |
| Svio | -----  | ----- | -----  | ----- | ----- | -----  | -----  |
| Ssed | -----  | ----- | -----  | ----- | ----- | -----  | -----  |
| Sone | -----  | ----- | -----  | ----- | ----- | -----  | -----  |
| Abac | -----  | ----- | -----  | ----- | ----- | -----  | -----  |
| Phal | -----  | ----- | -----  | ----- | ----- | -----  | -----  |
| Amac | -----  | ----- | -----  | ----- | ----- | -----  | -----  |
| Fbal | -----  | ----- | -----  | ----- | ----- | -----  | -----  |
| Asal | -----  | ----- | -----  | ----- | ----- | -----  | -----  |
| Ppro | -----  | ----- | -----  | ----- | ----- | -----  | -----  |
| Psys | -----  | ----- | -----  | ----- | ----- | -----  | -----  |
| Iloi | -----  | ----- | -----  | ----- | ----- | -----  | -----  |
| Rspc | -----  | ----- | -----  | ----- | ----- | -----  | -----  |
| Shdy | -----  | ----- | -----  | ----- | ----- | -----  | -----  |
| Shso | -----  | ----- | -----  | ----- | ----- | -----  | -----  |
| Ecol | -----  | ----- | -----  | ----- | ----- | -----  | -----  |
| Saen | -----  | ----- | -----  | ----- | ----- | -----  | -----  |
| Cyou | -----  | ----- | -----  | ----- | ----- | -----  | -----  |
| Ypse | SAGVLP | SDVTL | PGTVAL | PAAEP | VNTQP | QPMSTT | TETQQS |
| Ypes | SAGVLP | SDVTL | PGTVAL | PAAEP | VNMQP | QPMSTT | TETQQS |
| Spro | -----  | ----- | -----  | ----- | ----- | -----  | -----  |

**Figure S7: Sequence alignment of PomB homologues.** Amino acid sequences of PomB homologues were obtained from NCBI BLAST<sup>®</sup>, algorithm blastp (protein-protein BLAST) with query sequence gi|51241597 PomB *V. cholerae*. A multiple sequence alignment of the 41 sequences was performed using the ClustalW algorithm (1) implemented in the BioEdit Sequence Alignment Editor (Version 7.0.5.3, (2)) with default settings. Identical and similar residues were identified with BioEdit using an identity and similarity threshold of 83% and BLOSUM62 (3) scoring matrix. Bacteria which are predicted to operate a Na<sup>+</sup>-dependent flagellar motor are shaded in light grey, bacteria which are predicted to operate a H<sup>+</sup>-dependent flagellar motor are shaded in dark grey. Amino acids which were investigated in this work are highlighted with stars.

Vcho *Vibrio cholerae* (gi|254225118); Valg *Vibrio alginolyticus* (gi|269965067); Vcor *Vibrio coralliilyticus* (gi|260776526); Vfis *Vibrio fischeri* (gi|59711322); Vfur *Vibrio furnissii* (gi|260767264); Vhar *Vibrio harveyi* (gi|156973487); Vmet *Vibrio metschnikovii* (gi|260773298); Vmim *Vibrio mimicus* (gi|258624381); Vori *Vibrio orientalis* (gi|261252277); Vpar *Vibrio parahaemolyticus* (gi|4322001); Vspl *Vibrio splendidus* (gi|84394351); Vvul *Vibrio vulnificus* (gi|37679056); Bspc *Bacillus sp.* (gi|89100891); Bcoa *Bacillus coagulans* (gi|229543005); Bpse *Bacillus pseudofirmus* (gi|288553786); Bsel *Bacillus selenitrireducens* (gi|297583574); Hche *Hahella chejuensis* (gi|83648502); Rspc *Reinekea sp.* (gi|88799579); Ospc *Oceanospirillum sp.* (gi|89093474); Svio *Shewanella violacea* (gi|294139895); Ssed *Shewanella sediminis* (gi|157376457); Sone *Shewanella oneidensis* (gi|24347292); Abac *Alteromonadales bacterium* (gi|119472095); Phal *Pseudoalteromonas haloplanktis* gi|77361278; Amac *Alteromonas macleodii* gi|196156245; Fbal *Ferrimonas balearica* (gi|308048595); Asal *Aliivibrio salmonicida* (gi|209694505); Ppro *Photobacterium profundum* (gi|90410908); Psys *Psychromonas sp.* (gi|90408165); Iloi *Idiomarina loihiensis* (gi|56461234); Rspc *Roseovarius sp.* (gi|149201621); Shdy *Shigella dysenteriae* (gi|194434087); Shso *Shigella sonnei* (gi|74311761); Ecol *Escherichia coli* (gi|293415204); Saen *Salmonella enterica* (gi|161502956); Cyou *Citrobacter youngae* (gi|237731926); Ypse *Yersinia pseudotuberculosis* (gi|170023989); Ypes *Yersinia pestis* (gi|45441604); Spro *Serratia proteamaculans* (gi|157371226).

## References

1. **Thompson JD, Higgins DG, Gibson TJ.** 1994. CLUSTAL W: improving the sensitivity of progressive multiple sequence alignment through sequence weighting, position specific gap penalties and weight matrix choice. *Nucleic Acids Res.* **22**:4673-4680.
2. **Hall TA.** 1999. BioEdit: a user-friendly biological sequence alignment editor and analysis program for Windows 95/98/NT. *Nucl. Acids. Symp. Ser.* **41**:95-98.
3. **Henikoff S, Henikoff JG.** 1992. Amino acid substitution matrices from protein blocks. *Proceedings of the National Academy of Sciences* **89**:10915-10919.
